# Supplementary material
Source: PubMed Central journal article supplement (PMC3937738)
Supplement: NIHMS57159-supplement-Supplemental.pdf [file NIHMS57159-supplement-Supplemental.pdf]

## SUPPLEMENTAL FIGURES

Figure S1. Alignment of STING homologs

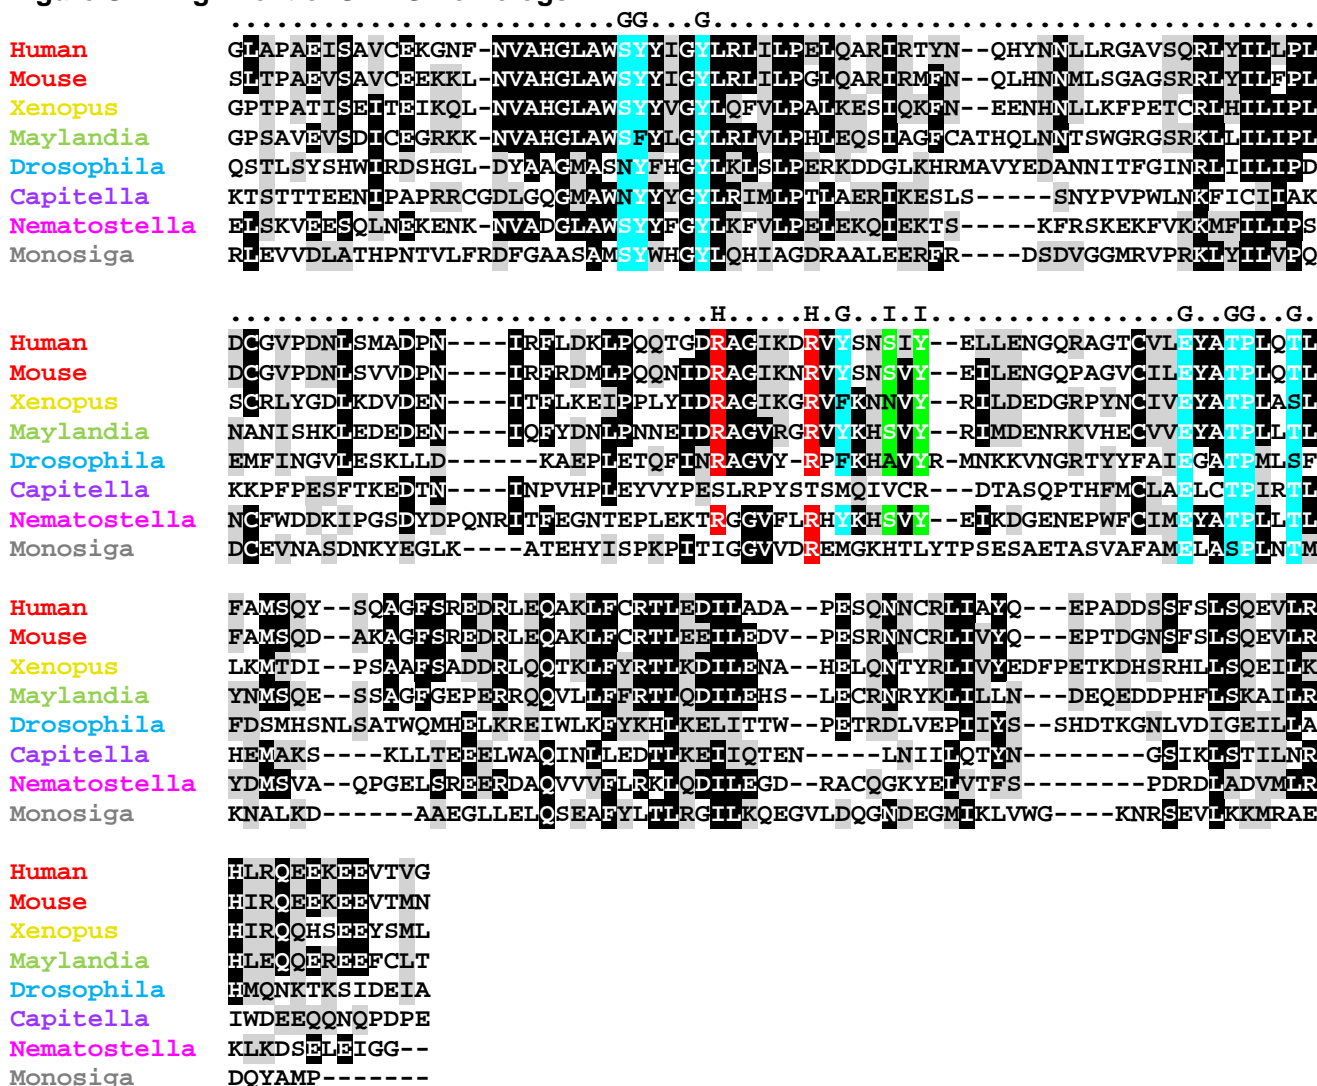

Homologs of human STING were retrieved by BlastP search of genomes from vertebrate and invertebrate phyla as indicated in the legend to figure 1. Sequences were aligned using M-coffee and the segment corresponding to the structurally analyzed STING-C domain (1-5) (6) is shown above, with the name of the species from which the sequence is derived color-coded to represent phylum as in figure 1A.

Residues that are identical or similar in at least half of the aligned proteins are highlighted in black and grey, respectively. Amino acid residues that interact with both c-di-GMP and 2'3'cGAMP are highlighted in blue and marked above the sequence with "G". Residues that specifically interact with 2'3'cGAMP are highlighted in red and marked with "H", and residues that mediate interdomain interactions induced by 2'3'cGAMPs are highlighted in green and marked with "I".

Genbank ids. *Homo sapiens*: NP\_938023; *Mus musculus*: NP\_082537; *Xenopus tropicalis*: NP\_001106445; *Maylandia zebra*: XP\_004563256; *Drosophila erecta*: XP\_001969143; *Capitella teleta*: ELT98160; *Nematostella vectensis*: XP\_001627385; *Monosiga brevicollis*: EDQ90889. Additional sequences used in phylogeny (Fig. 1A): *Gallus gallus*: XP\_001232171; *Anolis carolinensis*: XP\_003220124; *Pimiphales promelas*: CCI55628; *Danaus plexippus*: EHJ74437; *Camponotus floridanus*: EFN63910; *Daphnia pulex*: EFX66211; *Hydra magnipapillata*: XP\_004207409.

Figure S2. Alignment of cGAS homologs

.....DD.D...D.....D.....DU.PDD.....  
**Mouse\_cGAS** PDKLK-KVLDKLRIRKRDISEAAETVNVKVVVERLLRRM-QK----RESEFKGVEQLNTGSYYEHVKISAPN  
**Human\_cGAS** ASKLR-AVLEKLRISRDDISTAAGMVKGVVDHLLRL--K----CDSAFRGVGLNTGSYYEHVKISAPN  
**Xenopus** TKHLN-RTLKMQLKMDKESKAAEQVKLVKDLDFIKSS----KDPAFEGMEILNTGSYYEKVKISKPN  
**Maylandia** DYILK-ETLKKMILKMDKINAAEVINAIIRNIINHLKQN----TLSFNDVQEPKIGSYENLKIENPD  
**Branchiostom** QTKLKAIDNLVVPQDRSETAKIYNPIVRGILEEIKKIAVTEGESDIFRLOQLNSGSYFENLKVDTSN  
**Saccoglossus** VGDLYNYTDTQIKMRREKVKAAVNAVHVVDPILKYVHD----KDPREFSHOTWNS-GSVASGLKVTPEPN  
**Drosophila** IYQNNRFAERVQARMFKTATAIREICKIVQDILKEVEL----QEPRFISLSEV-NGRTEGVEVISPEN  
**Capitella** LFQNLKYYNERVQQRFAANSKAMREACKIVQDVLKEVEV----QEPRFISLSEV-NGRTEGLOVISPEN  
**Human\_MAB21** VYQNLKYYTERCQARAAAKTIREVCKVVSDVLKEVEV----QEPRFISLSEI-DARTEGVEVISPEN

M.M.....  
**Mouse\_cGAS** EFDVMFKLEVPRIELQ-----EY-----YETGAFYLVKFKRIPRGNPLSHLEG-EV  
**Human\_cGAS** EFDVMFKLEVPRIQLQ-----EY-----SNTRAYYFVKFKRNPKNPLSQLEG-EI  
**Xenopus** EFDIMLKIPCGRLRIS-----ES-----DASGSFYTLTINRNPKH-PLTNYVEN-CK  
**Maylandia** EFDVMLPILVDRVCLA-----PF-----GTDGAFYSVELKRGQK--NLERIEN-CI  
**Branchiostom** EFDVMFCIYGEKLVLQ-----ET-----EPDIGMVAVKLPKSS-NSSLRKYLTDPDF  
**Saccoglossus** EFDVNPMEGLPNLIWKTADKPAYYITDVGDLVETKVPLPNPPNGYHNVITDVTSDIWKPENMKMGDY  
**Drosophila** EFEIVLYLNQMGVFN-----VDDGTLPGCAVL--KLSDCR----KRSMSLWV--EFTTASCY  
**Capitella** EFEVLYLNQMGVFN-----VDDGAI PGCAVL--KLSDCR----KRSMSLWV--EFTTASCY  
**Human\_MAB21** EFEVLYLNQMGVFN-----VDDGSLPGCAVL--KLSDCR----KRSMSLWV--EFTTASCY

.....M.....  
**Mouse\_cGAS** LSATKMLSKFRKIIEEVEKEIKD-----IDVSVEKEKPGSPAVTLLIRN-PEEISVDITLALLESK  
**Human\_cGAS** LSASKMLSKFRKIIEEINDIKD-----TDVIMKRKRGGSPAVTLLIS--EKISVDITLALLESK  
**Xenopus** ISGQOQLDRLELTKSKLSRLG-----TGINVERRNAASPAVTLKIG----EISVDLVALLEVE-  
**Maylandia** LSATKMLNEFREFVKKVKNFT-----GWKVDKKGKCPAVTLLTHVQSVPIISLVDVLCIMVK-  
**Branchiostom** LSPKLLSRFRSLVERAVDTLSRAGAESPFRGLQFELTPQKDGCPAVTLMVAKKRLQISTLVLALVAP-  
**Saccoglossus** VVPFKVTKTEKVLVKNVRECKL-----RESVRVLKKTHTGPAITLMVSSGEERISVDLVLVLPANG  
**Drosophila** LSSRKIRARFQTLVAQACDKSVY-----RDLVKMVGDTSEVKLR----IRERFVQITPAFKC--  
**Capitella** LSARKIRSRFQTLVAQAVDKCSY-----RDIVKMAVDTSEVRLR----IRERIVQITPAFKC--  
**Human\_MAB21** LSARKIRSRFQTLVAQAVDKCSY-----RDVVKMIADTSEVKLR----IRERYVQITPAFKC--

.....U.U.U...D..  
**Mouse\_cGAS** -GSWPISSTKEG-LP-IQGWLGTQVVRTNLRREPFYLVPKNAKDGN-----SFOGETWRLSFSHTEKYI  
**Human\_cGAS** -SSWPASTQEG-LR-IQNWLSAKVRKQLRLKPFYLVPKHAKEGN-----GFOEETWRLSFSHTEKEI  
**Xenopus** -GSWPSSTSEG-MK-IETWLGAKVKRDYKFEPMYFVAKQLKNT-----EELWRISFSHTEKEI  
**Maylandia** -SSWPPFTTQG-LK-IECWLGHKVQDYKREPYLVPKYEGKGT---VENDGVRNKDVVRVFSHTEKAI  
**Branchiostom** -PPWPKCTKEWKNG-VTLWPNRSRDIRKIKKNEHLVAKAAPPGK---D----PGGNKLWRLSFSQAEKDI  
**Saccoglossus** RGLPPNVLNSWPRS--PVWPKHKVVEVRKIGTDSVAKDNL-----YWLTSFSRCEIAL  
**Drosophila** SGIWPRSAAHWVPV-HLPWPHPNVVAEVKTEGFDLLSKESVVLQSKNNNNAASMEGDAVWLSFEAEENRL  
**Capitella** GGIWPRSAAHWPIP-HIPWPNPNLVAEVKTEGFDLLSKDNINMKDKQ---SAAEGDSVWLSFANAEQOL  
**Human\_MAB21** TGIWPRSAAQWMP-HIPWPGPNRVAEVKAEGENLLSKECYSLTGKQ---SSAESDAVWLVFEAEENRL

.....D...D..P.....PU.....  
**Mouse\_cGAS** LNNHGIEKTCCESSGAKCCRKECLKMLKYLLEQLKKEFQ---ELDAFCSYHVKTAIFHMWTQDPQDSQWD  
**Human\_cGAS** LNNHGKSKTCENKEEKCCRKCLKMLKYLLEQLKERFKDKKHLDFKS SYHVKTAFHFVCTQNPQDSQWD  
**Xenopus** LKNHGNAKTCCETEGVKCCRKQCLKMLKYLLEQLKS--KGNRNMTHFC SYHAKTALLHSCITLYPKDDWR  
**Maylandia** LKNHGSKTCCEQSGENCRRKCLKMLKYLLEQLKER---DSSFDFKFC SYHAKTLLHACCLRTDDNKWR  
**Branchiostom** FSGKIINPT-DASHAKTCRKCCLKMLKYLLEQLKQLTGGVA---RDVDFASVHLKTVLLHAIKQD--NGWE  
**Saccoglossus** LDG--I-----DSDEGCRKQCLRLKLRKIREDHWS---P--ALSSYHLKNLLECEKHPNSHDWS  
**Drosophila** L-----QGGCRRRCLSMKTLRDRHLEL----PGNPIS SYHLKNLLECEKHPREIWD  
**Capitella** L-----QGGCRRKCLSMKTLRDRHLDL----PGHPIEVEHIKTLLECEKHPREIWD  
**human\_MAB21** L-----MGGCRNKCLSVLTLRDRHLEL----PGQPLNNSYHMKTLLECEKHPRETDWD

**Mouse\_cGAS** PRNLSSECFDKLLAFFLECLRTEKLDHYFIPKFNLFSSQELIDRK-----SKEFLTKQIEYE-RNNGFPPIF  
**Human\_cGAS** RKDLGLCFDNCVTFYFLQCLRTEKLENYFIPEFNLFSSNLIIDKR-----SKEFLTKQIEYE-RNNEFPVF

**Xenopus** PKDLAACFDRIYIEDFMKCIKDKARLENFFIPSLNLFSEELIPKK-----CLDYLLRKLDKQ-KKLQYTLF  
**Maylandia** VSDLSDCFQVLLQDFEGYLENGQLCNFFIPSONLFSGIRVCKG-----LSDAIREE-RRKGFPIF  
**Branchiostom** NDNLVTCIVYVIDELVQCIIKRHLPHFFIPGYNLFDPVFRGLRHLDAVKNHFLRLNLCVLQYKRRSSLL  
**Saccoglossus** RDMLGQRFVGLVGSLLKCLRGQNCPHYFIPSSINLFRNKENSCLKKE---PENLLLAIADKVQEFYENPCGFI  
**Drosophila** ESCIADRINGIFLQLISCIQYRRCPHYFLPGLDMFKGKSPSALEN---AAKQVWRLTRMLTNANAFEKL  
**Capitella** ETCLGDRINGILLQMISSCIGNRRCPYYFLPNMDLFRGKSASSMDA---AAKQAWRILRELLTNSRSLEKL  
**Human\_MAB21** ESCLDRLNGILLQLISCIQCRRCPHYFLPNLDLFDQGKPHSALES---AAKQVWRLTRMLTNPKSLDKL

Sequences of homologs of mouse cGAS were retrieved, aligned and presented with color-coded species names as described above. The segment corresponding to the crystallized mouse cGAS domain is shown (7).

Residues that are identical or similar in at least half of the aligned proteins are highlighted in black and grey, respectively. Amino acid residues that interact with DNA are highlighted in green and marked with “D” above the sequence. Residues that interact with the purine moiety of the substrates GTP and/or ATP are highlighted in red and marked with “U”. Residues that interact the  $\gamma$ -phosphate of ATP or GTP are highlighted in yellow and marked “P”, while residues that interact via a  $Me^{2+}$  ion with the  $\alpha$ - or  $\beta$ - phosphate are highlighted in blue and marked “M”.

Genbank ids: *Mus musculus* cGAS: NP\_775562; *Homo sapiens* cGAS: NP\_612450; *Xenopus tropicalis*: XP\_002937200; *Maylandia zebra*: XP\_004553495; *Branchiostoma floridae*: XP\_002596738; *Saccoglossus kowalevski*: XP\_002740936; *Drosophila ananassae*: XP\_001966298; *Capitella teleta*: ELT95908; *Homo sapiens* MAB21L2: AAG09800. Additional sequences used in phylogeny (Fig. 1B): *Gallus gallus*: XP\_419881; *Anolis carolinensis*: XP\_003226105; *Metaseiulus occidentalis*: XP\_003738072; *Crassostrea gigas*: EKC35425; *Nematostella vectensis*: XP\_001634789; *Mus musculus* MAB21L2: AAD40478.

## REFERENCES

- Huang Y.H., Liu X.Y., Du X.X., Jiang Z.F., and Su X.D. (2012) The structural basis for the sensing and binding of cyclic di-GMP by STING. *Nat Struct Mol Biol* **19**, 728-730.
- Ouyang S., Song X., Wang Y., Ru H., Shaw N., et al. (2012) Structural analysis of the STING adaptor protein reveals a hydrophobic dimer interface and mode of cyclic di-GMP binding. *Immunity* **36**, 1073-1086.
- Shang G., Zhu D., Li N., Zhang J., Zhu C., et al. (2012) Crystal structures of STING protein reveal basis for recognition of cyclic di-GMP. *Nat Struct Mol Biol* **19**, 725-727.
- Shu C., Yi G., Watts T., Kao C.C., and Li P. (2012) Structure of STING bound to cyclic di-GMP reveals the mechanism of cyclic dinucleotide recognition by the immune system. *Nat Struct Mol Biol* **19**, 722-724.
- Yin Q., Tian Y., Kabaleeswaran V., Jiang X., Tu D., et al. (2012) Cyclic di-GMP sensing via the innate immune signaling protein STING. *Mol Cell* **46**, 735-745.
- Zhang X., Shi H., Wu J., Zhang X., Sun L., et al. (2013) Cyclic GMP-AMP Containing Mixed Phosphodiester Linkages Is An Endogenous High-Affinity Ligand for STING. *Mol Cell*. 1-10.
- Gao P., Ascano M., Wu Y., Barchet W., Gaffney B.L., et al. (2013) Cyclic [G(2',5')pA(3',5')p] Is the Metazoan Second Messenger Produced by DNA-Activated Cyclic GMP-AMP Synthase. *Cell* **153**, 1094-1107.
